# Supplementary material
Source: publisher figshare collection journal article supplement (https://tandf.figshare.com/ndownloader/files/24389836)
Supplement: Supplementary file 1 [file 24389836]

## Supplementary material Table S1 and Figures S1 and S2

Shlimon et al. Microbial Community Composition in Crude Oils and Asphalts from the Kurdistan Region of Iraq

**Table S1.** Genus-level taxonomic affiliation of archaeal 16S rRNA gene sequence reads. Numbers show percent relative abundance of a given group among the archaeal sequence reads in the sequence library of a given sample. Num. reads: Number of archaeal sequence reads in a given library. Note that archaeal reads constitute  $\leq 0.2\%$  of the reads in any sequence library (Figure 6). Sample names refer to Table 1. O.s.: oil seep. A.s.: asphalt seep.

| ZEG crude oil | STV a.s | STV o.s. | Tawke o.s. <sup>#</sup> | Tawke o.s. <sup>*</sup> | Tawke a.s. 1 | Tawke a.s. 2 | Soil 1 | Soil 2 | Soil 3 | Soil 4 | Soil 7 | Soil 5 | Soil 6 |                                   |
|---------------|---------|----------|-------------------------|-------------------------|--------------|--------------|--------|--------|--------|--------|--------|--------|--------|-----------------------------------|
| 24            | 40      | 10       | 7                       | 10                      | 6            | 0            | 33     | 28     | 1      | 50     | 10     | 34     | 24     | Num. reads.                       |
| 4             | 0       | 0        | 0                       | 0                       | 0            | 0            | 0      | 7      | 0      | 4      | 0      | 0      | 8      | Archaea unclassified              |
| 0             | 0       | 10       | 0                       | 0                       | 0            | 0            | 0      | 0      | 0      | 2      | 0      | 0      | 0      | Odinarchaeia                      |
| 8             | 8       | 40       | 0                       | 0                       | 0            | 0            | 3      | 43     | 100    | 44     | 70     | 29     | 13     | Bathyarchaeia                     |
| 0             | 5       | 0        | 86                      | 20                      | 1            | 0            | 6      | 0      | 0      | 0      | 0      | 0      | 0      | Methanobacteria unclassified      |
| 63            | 87      | 40       | 14                      | 70                      | 0            | 0            | 88     | 46     | 0      | 44     | 20     | 59     | 67     | Woesearchaeia                     |
| 4             | 0       | 0        | 0                       | 0                       | 0            | 0            | 0      | 4      | 0      | 0      | 0      | 0      | 0      | <i>Candidatus</i> Nitrosoarchaeum |
| 21            | 0       | 0        | 0                       | 10                      | 0            | 0            | 3      | 0      | 0      | 6      | 10     | 12     | 12     | <i>Candidatus</i> Nitrososphaera  |

<sup>#</sup>Oil fraction

<sup>\*</sup>Oil-water fraction.

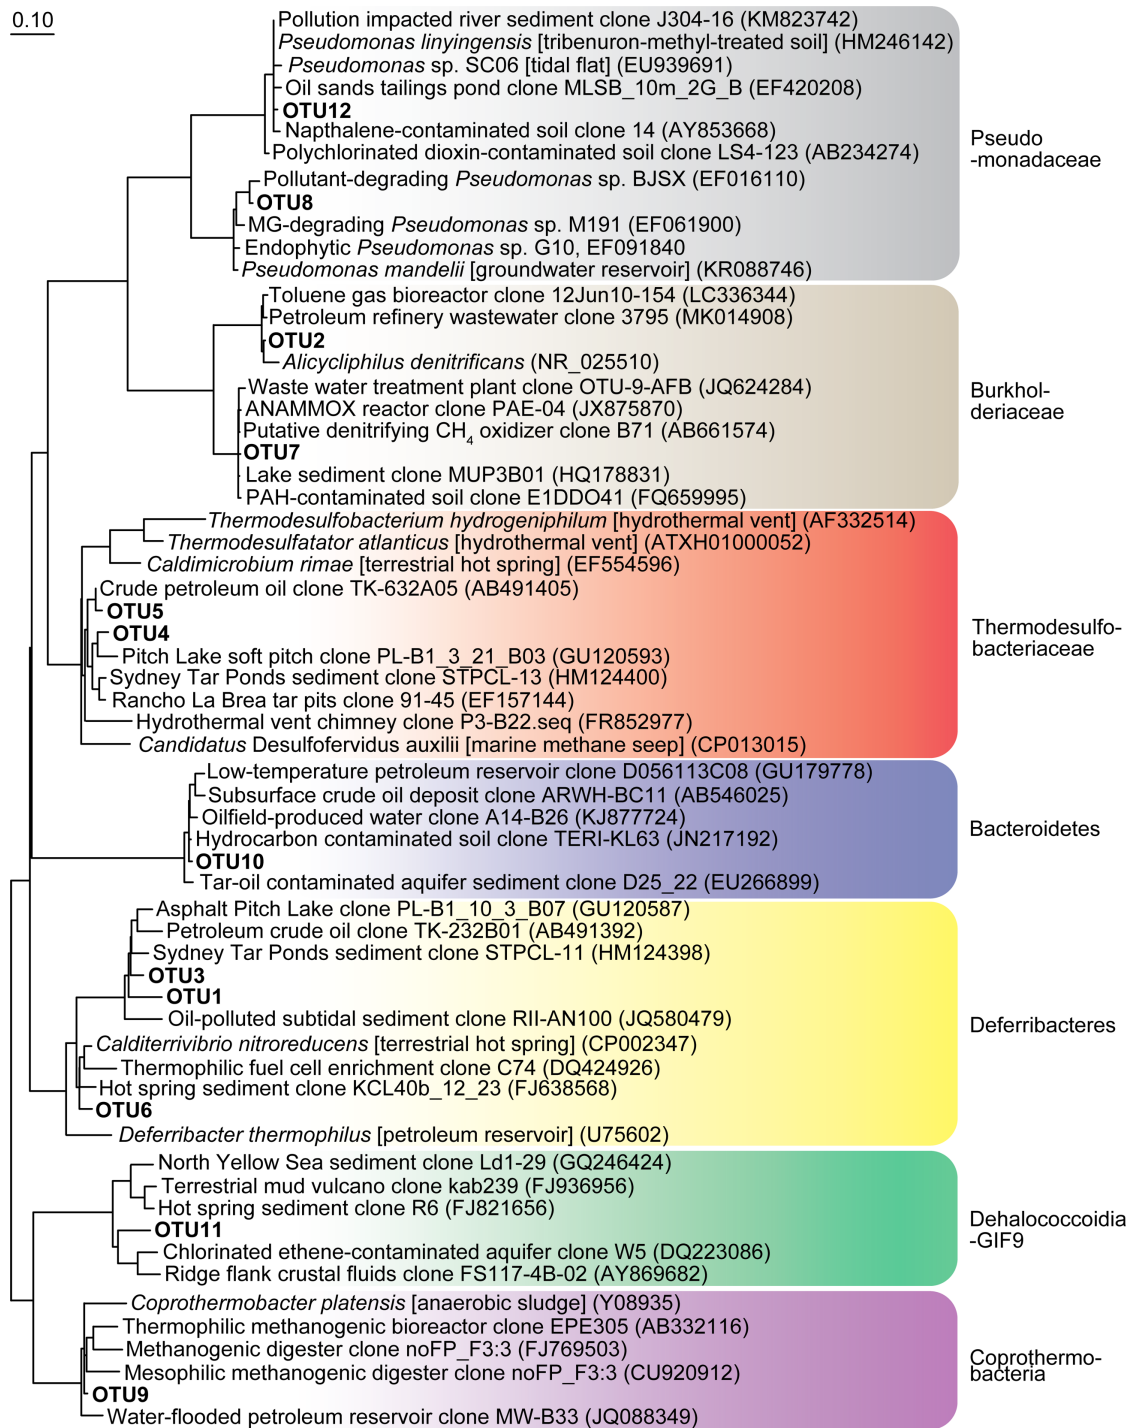

**Figure S1.** Phylogenetic affiliation of representative sequences of the 12 most abundant 16S rRNA gene sequence OTUs (marked in bold) in sequence libraries from oil and asphalt samples. The distribution of a given OTU among the different samples is shown in Figure 7. The tree was inferred by adding the representative OTU sequences to the guide tree of the SILVA\_132\_SSURef\_NR99 database without changing its overall topology using the parsimony tool of the ARB program package (Ludwig et al. 2004).

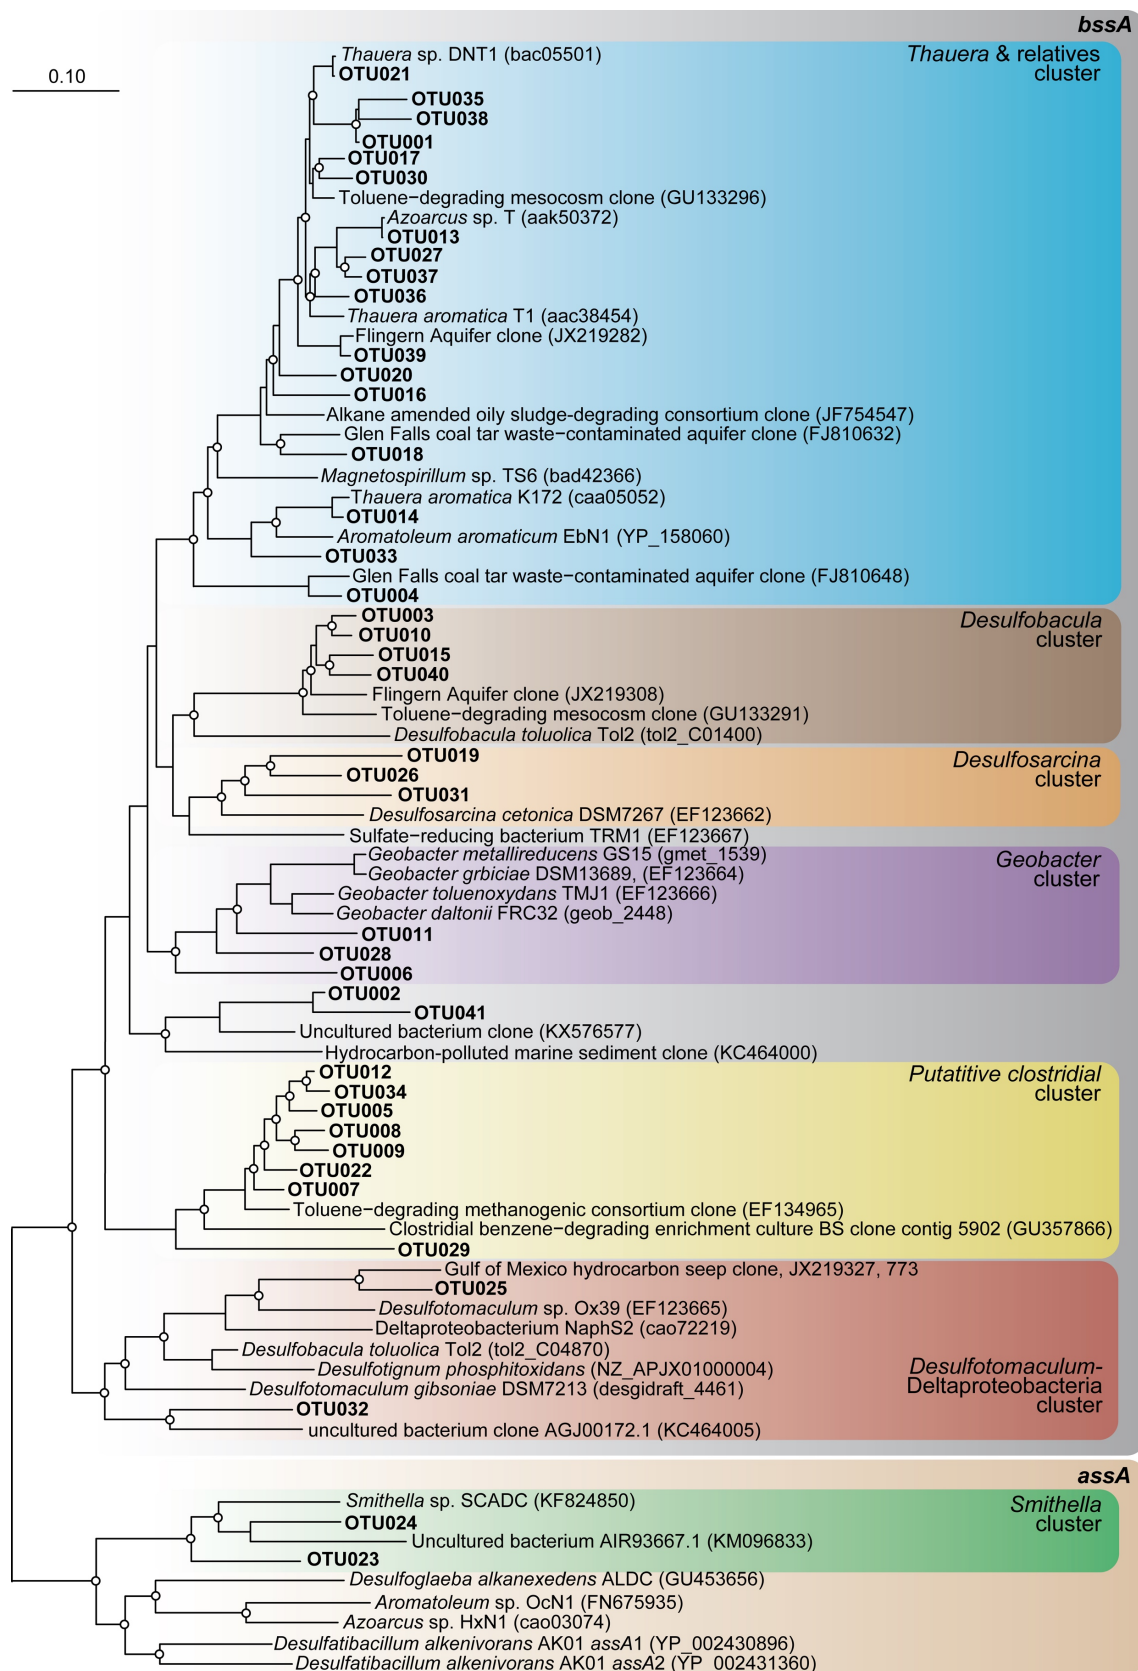

**Figure S2.** Phylogenetic affiliation of representative sequences of the benzyl and alkyl succinate synthase gene (*bssA* and *assA*) sequence OTUs (marked in bold) identified in sequence libraries from oil and asphalt samples. The distribution of a given OTU among the different samples is shown in Figure 8. The tree was inferred by RaxML analysis.
